# Supplementary material for: In vivo repressed genes of Vibrio cholerae reveal inverse requirements of an H+/Cl− transporter along the gastrointestinal passage
Source: PubMed Central journal article supplement — Proc Natl Acad Sci U S A. 2018 Feb 20;115(10):E2376–85. doi: 10.1073/pnas.1716973115 (PMC5877934; doi:10.1073/pnas.1716973115), 2018-02-20
Supplement: pnas.201716973SI.pdf [file pnas.201716973SI.pdf]

# Supporting Information

Cakar et al. 10.1073/pnas.1716973115

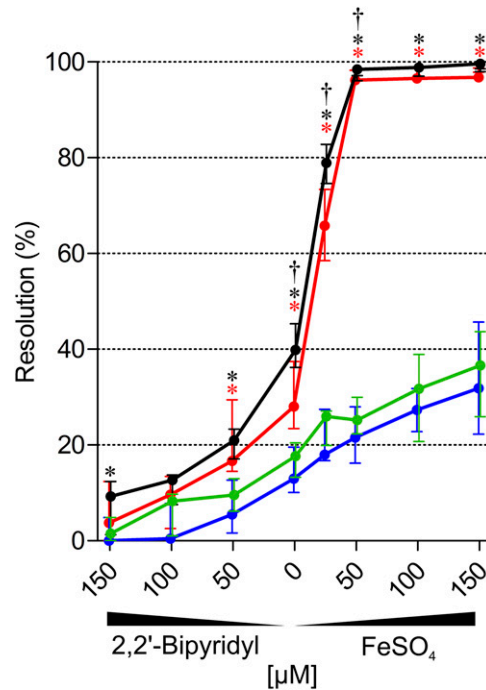

**Fig. S1.** Impact of iron availability on resolution frequency of the four reporter strains. Shown are the resolution frequencies versus iron concentrations for the four *V. cholerae* reporter strains *Vc\_res\_TRIVET irgA::tpc* (black), *Vc\_res1\_TRIVET irgA::tpc* (red), *Vc\_res\_TRIVET1 irgA::tpc* (green), and *Vc\_res1\_TRIVET1 irgA::tpc* (blue) with variation of the *res* or *res1* cassette and pTRIVET or pTRIVET1 harboring different TetR-controlled promoter elements upstream of *tnpR*. Resolution was determined after 8 h in LB supplemented with varying amounts of 2,2'-bipyridyl or FeSO<sub>4</sub> as indicated to mimic low and high iron concentrations, respectively. Data are presented as the median with interquartile range from at least six independent experiments. Significant differences between resolution frequencies at a given iron concentration are indicated as follows: cross symbol [comparison of *Vc\_res\_TRIVET irgA::tpc* (black) and *Vc\_res1\_TRIVET irgA::tpc* (red)], black asterisk [comparison of *Vc\_res\_TRIVET irgA::tpc* (black) and *Vc\_res\_TRIVET1 irgA::tpc* (green)], and red asterisk [comparison of *Vc\_res1\_TRIVET irgA::tpc* (red) and *Vc\_res1\_TRIVET1 irgA::tpc* (blue)], respectively ( $P < 0.05$ , using a Mann-Whitney *U* test).

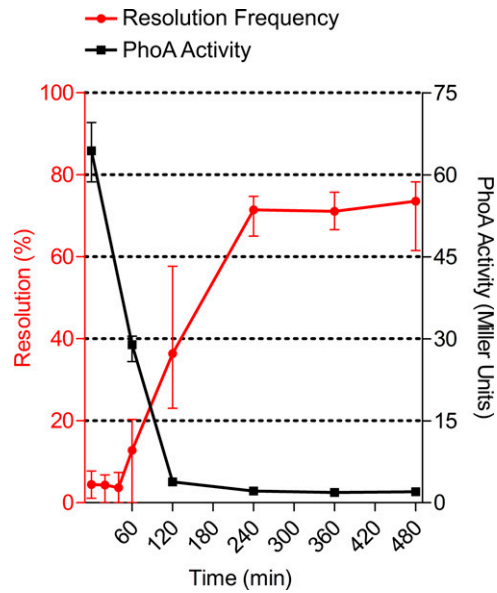

**Fig. 52.** Kinetics of resolution frequency and alkaline phosphatase (PhoA) activity. *Vc\_res1\_TRIVET irgA::tpc* was grown to late logarithmic phase in low iron medium (LB supplemented with 150  $\mu$ M 2,2'-bipyridyl) to prevent resolution and then shifted to high iron medium (LB supplemented with 25  $\mu$ M  $\text{FeSO}_4$ ) and assayed for resolution (red) or PhoA activity (black) at the time points indicated on the x axis. Data are presented as the median with interquartile range from at least six independent experiments.

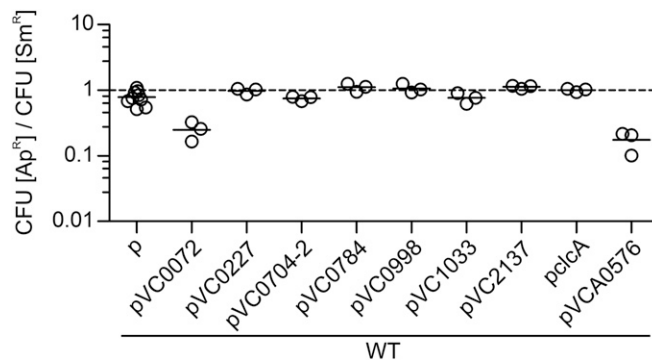

**Fig. 53.** Maintenance of pBR322 and derivatives in the absence of antibiotic selection. The stability of pBR322 (p, Ap<sup>R</sup>) and derivatives pVC0072, pVC0227, pVC0704-2, pVC0784, pVC0998, pVC1033, pVC2137, pclcA, and pVCA0576 in *V. cholerae* WT is indicated as the ratio of cfu [Ap<sup>R</sup>]/cfu [Sm<sup>R</sup>] after 16 h incubation in LB-Sm. A ratio of 1 (dashed line) indicates optimal plasmid stability. Horizontal bars indicate the mean of each dataset ( $n \geq 3$ ).

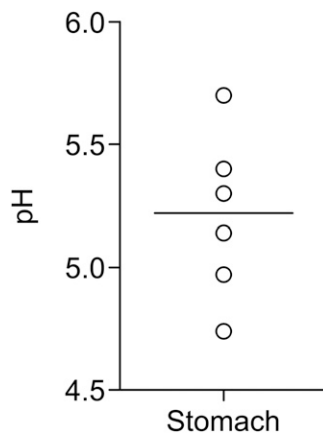

**Fig. 54.** Stomach content of infant mice is acidic. Stomach content of 5-d-old CD-1 mice was resuspended in 1 mL of saline, and the pH was measured by a pH meter (Metrohm 827 pH laboratory). Each circle represents the pH from an individual stomach content, and the horizontal bar indicates the median of the dataset ( $n = 6$ ).

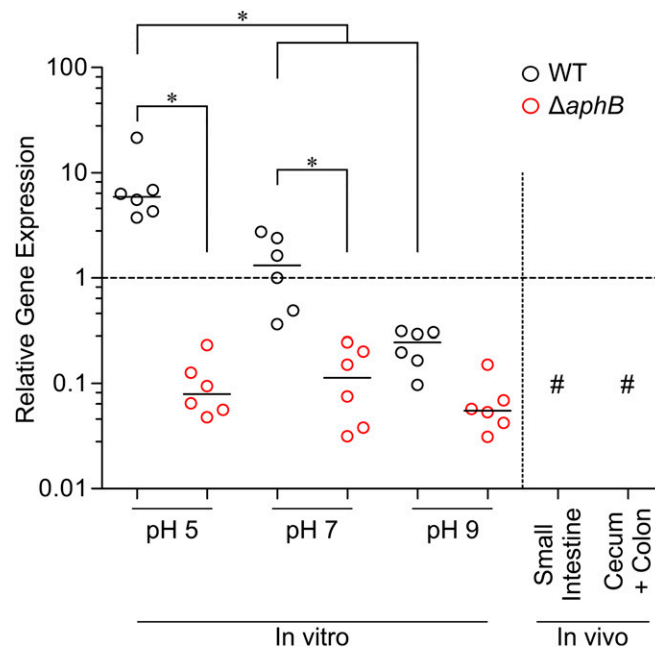

**Fig. S5.** Transcriptional regulation of *c/cA* validated by qRT-PCR. Relative expression levels of *c/cA* were determined by qRT-PCR for WT (black circles) and  $\Delta aphB$  (red circles) grown in vitro using LB broth adjusted to pH 5, pH 7, or pH 9, as well as in vivo for WT colonizing the murine gastrointestinal tract (small intestine and cecum with colon). Each circle represents a biological replicate, horizontal lines highlight the median of each dataset, and an asterisk indicates significant differences ( $n = 6$ ,  $P < 0.05$ , using a Kruskal–Wallis test followed by post hoc Dunn’s multiple comparisons). The dashed line indicates a relative *c/cA* expression of 1. As *c/cA* mRNA transcripts were not detected in six out of six independent in vivo samples, the in vivo expression levels were set to the limit of detection (0.1 with respect to the WT pH 7 data set) indicated by the number sign (#).

**Table S1. Strains and plasmids used in this study**

| Strain or plasmid                                      | Genotype/resistance                                                                                                                                                                                                                        | Source              |
|--------------------------------------------------------|--------------------------------------------------------------------------------------------------------------------------------------------------------------------------------------------------------------------------------------------|---------------------|
| <i>E. coli</i> strains                                 |                                                                                                                                                                                                                                            |                     |
| DH5 $\alpha$ pir                                       | F <sup>-</sup> <i>endA1 glnV44 thi-1 recA1 relA1 gyrA96 deoR nupG</i> $\Phi$ 80 <i>dlacZ</i> $\Delta$ M15<br>$\Delta$ ( <i>lacZYA-argF</i> )U169 <i>hsdR17</i> (r <sub>K</sub> <sup>-</sup> m <sub>K</sub> <sup>+</sup> ) $\lambda$ pirRK6 | (54)                |
| XL-1                                                   | F <sup>+</sup> ::Tn10 <i>proA + B + lac<sup>G</sup></i> $\Delta$ ( <i>lacZ</i> )M15/ <i>recA1 endA1 gyrA46</i> (Nal <sup>I</sup> ) <i>thi hsdR17</i><br>(r <sub>K</sub> <sup>-</sup> m <sub>K</sub> <sup>+</sup> ) <i>supE44 relA1 lac</i> | New England Biolabs |
| SM10 $\lambda$ pir                                     | <i>thi-1 thr leu tonA lacY supE recA</i> ::RP4-2-Tc::Mu $\lambda$ pirRK6                                                                                                                                                                   | (55)                |
| <i>V. cholerae</i> strains                             |                                                                                                                                                                                                                                            |                     |
| WT                                                     | Spontaneous Sm <sup>R</sup> mutant of E7946 (O1 El Tor Inaba), Sm <sup>R</sup>                                                                                                                                                             | (56, 57)            |
| $\Delta$ <i>lacZ</i>                                   | Deletion of <i>lacZ</i> in WT, LacZ <sup>-</sup> , Sm <sup>R</sup>                                                                                                                                                                         | This study          |
| $\Delta$ <i>clcA</i>                                   | Deletion of <i>clcA</i> (VCA0526) in WT, Sm <sup>R</sup>                                                                                                                                                                                   | This study          |
| $\Delta$ <i>aphB</i>                                   | Deletion of <i>aphB</i> (VC1049) in WT, Sm <sup>R</sup>                                                                                                                                                                                    | This study          |
| <i>irgA</i> :: <i>tpc</i>                              | Insertion of <i>tetRphoAcat</i> downstream of <i>irgA</i> in WT, Sm <sup>R</sup> , Cm <sup>R</sup>                                                                                                                                         | This study          |
| Vc_res <i>irgA</i> :: <i>tpc</i>                       | Insertion of res cassette in <i>lacZ</i> in <i>irgA</i> :: <i>tpc</i> , Sm <sup>R</sup> , Cm <sup>R</sup> , Km <sup>R</sup>                                                                                                                | This study          |
| Vc_res1 <i>irgA</i> :: <i>tpc</i>                      | Insertion of res1 cassette in <i>lacZ</i> in <i>irgA</i> :: <i>tpc</i> , Sm <sup>R</sup> , Cm <sup>R</sup> , Km <sup>R</sup>                                                                                                               | This study          |
| Vc_res_TRIVET <i>irgA</i> :: <i>tpc</i>                | Insertion of P <sub>tetA</sub> controlled <i>tnpR</i> in Vc_res <i>irgA</i> :: <i>tpc</i> , Sm <sup>R</sup> , Cm <sup>R</sup> , Km <sup>R</sup>                                                                                            | This study          |
| Vc_res1_TRIVET <i>irgA</i> :: <i>tpc</i>               | Insertion of P <sub>tetA</sub> controlled <i>tnpR</i> in Vc_res1 <i>irgA</i> :: <i>tpc</i> , Sm <sup>R</sup> , Cm <sup>R</sup> , Km <sup>R</sup>                                                                                           | This study          |
| Vc_res_TRIVET1 <i>irgA</i> :: <i>tpc</i>               | Insertion of P <sub>tet1</sub> controlled <i>tnpR</i> in Vc_res <i>irgA</i> :: <i>tpc</i> , Sm <sup>R</sup> , Cm <sup>R</sup> , Km <sup>R</sup>                                                                                            | This study          |
| Vc_res1_TRIVET1 <i>irgA</i> :: <i>tpc</i>              | Insertion of P <sub>tet1</sub> controlled <i>tnpR</i> in Vc_res1 <i>irgA</i> :: <i>tpc</i> , Sm <sup>R</sup> , Cm <sup>R</sup> , Km <sup>R</sup>                                                                                           | This study          |
| <i>clcA</i> :: <i>tpc</i>                              | Insertion of <i>tetRphoAcat</i> downstream of <i>clcA</i> in WT, Sm <sup>R</sup> , Cm <sup>R</sup>                                                                                                                                         | This study          |
| Vc_res1 <i>clcA</i> :: <i>tpc</i>                      | Insertion of res1 cassette in <i>lacZ</i> in <i>clcA</i> :: <i>tpc</i> , Sm <sup>R</sup> , Cm <sup>R</sup> , Km <sup>R</sup>                                                                                                               | This study          |
| Vc_res1_TRIVET <i>clcA</i> :: <i>tpc</i>               | Insertion of P <sub>tetA</sub> controlled <i>tnpR</i> in Vc_res1 <i>clcA</i> :: <i>tpc</i> , Sm <sup>R</sup> , Cm <sup>R</sup> , Km <sup>R</sup>                                                                                           | This study          |
| $\Delta$ <i>aphB clcA</i> :: <i>tpc</i>                | Insertion of <i>tetRphoAcat</i> downstream of <i>clcA</i> in $\Delta$ <i>aphB</i> , Sm <sup>R</sup> , Cm <sup>R</sup>                                                                                                                      | This study          |
| $\Delta$ <i>aphB Vc_res1 clcA</i> :: <i>tpc</i>        | Insertion of res1 cassette in <i>lacZ</i> in $\Delta$ <i>aphB clcA</i> :: <i>tpc</i> , Sm <sup>R</sup> , Cm <sup>R</sup> , Km <sup>R</sup>                                                                                                 | This study          |
| $\Delta$ <i>aphB Vc_res1_TRIVET clcA</i> :: <i>tpc</i> | Insertion of P <sub>tetA</sub> controlled <i>tnpR</i> in $\Delta$ <i>aphB Vc_res1 clcA</i> :: <i>tpc</i> ,<br>Sm <sup>R</sup> , Cm <sup>R</sup> , Km <sup>R</sup>                                                                          | This study          |
| Vc_res                                                 | Insertion of res cassette in <i>lacZ</i> in WT, Sm <sup>R</sup> , Km <sup>R</sup>                                                                                                                                                          | This study          |
| Vc_res1                                                | Insertion of res1 cassette in <i>lacZ</i> in WT, Sm <sup>R</sup> , Km <sup>R</sup>                                                                                                                                                         | This study          |
| Vc_res::pLOFtpc                                        | Transposon mutant library with random chromosomal insertions of the<br><i>tetRphoAcat</i> in Vc_res, Sm <sup>R</sup> , Cm <sup>R</sup> , Km <sup>R</sup>                                                                                   | This study          |
| Vc_res1::pLOFtpc                                       | Transposon mutant library with random chromosomal insertions of the<br><i>tetRphoAcat</i> in Vc_res1, Sm <sup>R</sup> , Cm <sup>R</sup> , Km <sup>R</sup>                                                                                  | This study          |
| Vc_res_TRIVET::pLOFtpc                                 | Integration of TetR-controlled (P <sub>tetA</sub> ) <i>tnpR</i> downstream of <i>lacZ</i> in<br>Vc_res::pLOFtpc, Sm <sup>R</sup> , Cm <sup>R</sup> , Km <sup>R</sup>                                                                       | This study          |
| Vc_res1_TRIVET::pLOFtpc                                | Integration of TetR-controlled (P <sub>tetA</sub> ) <i>tnpR</i> downstream of <i>lacZ</i> in<br>Vc_res1::pLOFtpc, Sm <sup>R</sup> , Cm <sup>R</sup> , Km <sup>R</sup>                                                                      | This study          |
| Vc_res_TRIVET1::pLOFtpc                                | Integration of TetR-controlled (P <sub>tetO</sub> ) <i>tnpR</i> downstream of <i>lacZ</i> in<br>Vc_res::pLOFtpc, Sm <sup>R</sup> , Cm <sup>R</sup> , Km <sup>R</sup>                                                                       | This study          |
| Vc_res1_TRIVET1::pLOFtpc                               | Integration of TetR-controlled (P <sub>tetO</sub> ) <i>tnpR</i> downstream of <i>lacZ</i> in<br>Vc_res1::pLOFtpc, Sm <sup>R</sup> , Cm <sup>R</sup> , Km <sup>R</sup>                                                                      | This study          |
| Plasmids                                               |                                                                                                                                                                                                                                            |                     |
| pCVD442                                                | Suicide vector, OriR6K, <i>sacB</i> , Ap <sup>R</sup>                                                                                                                                                                                      | (25)                |
| p                                                      | pBR322 origin, Ap <sup>R</sup> , Tc <sup>R</sup>                                                                                                                                                                                           | (58)                |
| pAC1000                                                | Cm <sup>R</sup>                                                                                                                                                                                                                            | (59)                |
| pTrc99A-Km                                             | pBR322 origin, Km <sup>R</sup>                                                                                                                                                                                                             | (60)                |
| pGOA1193                                               | pIVET5n <i>tnpR</i> , <i>oriR6K mobRP4 lacZ tnpR</i> , Ap <sup>R</sup>                                                                                                                                                                     | (17)                |
| pGP704                                                 | <i>oriR6K mobRP4</i> , Ap <sup>R</sup>                                                                                                                                                                                                     | (55)                |
| pCVD442 <i>irgA</i> :: <i>tpc</i>                      | pCVD442 with <i>irgA</i> :: <i>tetRphoAcat</i> , Ap <sup>R</sup>                                                                                                                                                                           | This study          |
| pCVD442 <i>clcA</i> :: <i>tpc</i>                      | pCVD442 with <i>clcA</i> :: <i>tetRphoAcat</i> , Ap <sup>R</sup>                                                                                                                                                                           | This study          |
| pCVD442 <i>lacZ</i>                                    | Suicide vector for deletion of <i>lacZ</i> , OriR6K, <i>sacB</i> , Ap <sup>R</sup>                                                                                                                                                         | This study          |
| pRes                                                   | pSL111 with <i>res-neo-sacB-res</i> cassette, Km <sup>R</sup>                                                                                                                                                                              | (17)                |
| pRes1                                                  | pSL111 with <i>res1-neo-sacB-res1</i> cassette, Km <sup>R</sup>                                                                                                                                                                            | (17)                |
| pLOFKm                                                 | Tn10 based delivery plasmid, Km <sup>R</sup> , Ap <sup>R</sup>                                                                                                                                                                             | (24)                |
| pLOF:: <i>tpc</i>                                      | <i>tetRphoAcat</i> cassette in pLOF, Ap <sup>R</sup> , Cm <sup>R</sup>                                                                                                                                                                     | This study          |
| pTRIVET                                                | P <sub>tetA</sub> controlled <i>tnpR</i> in pGP704, Ap <sup>R</sup>                                                                                                                                                                        | This study          |
| pTRIVET1                                               | P <sub>tet1</sub> controlled <i>tnpR</i> in pGP704, Ap <sup>R</sup>                                                                                                                                                                        | This study          |
| pTrc- <i>tpc</i>                                       | pTrc99A with <i>tetR::phoA::cat</i> , Km <sup>R</sup>                                                                                                                                                                                      | This study          |
| pVC0072                                                | VC0072 of E7946 in pBR322, Ap <sup>R</sup>                                                                                                                                                                                                 | This study          |
| pVC0227                                                | VC0227 of E7946 in pBR322, Ap <sup>R</sup>                                                                                                                                                                                                 | This study          |
| pVC0704-2                                              | VC0704, VC0703 and VC0702 of E7946 in pBR322, Ap <sup>R</sup>                                                                                                                                                                              | This study          |
| pVC0784                                                | VC0784 of E7946 in pBR322, Ap <sup>R</sup>                                                                                                                                                                                                 | This study          |
| pVC0998                                                | VC0998 of E7946 in pBR322, Ap <sup>R</sup>                                                                                                                                                                                                 | This study          |
| pVC1033                                                | VC1033 of E7946 in pBR322, Ap <sup>R</sup>                                                                                                                                                                                                 | This study          |
| pVC2137                                                | VC2137 of E7946 in pBR322, Ap <sup>R</sup>                                                                                                                                                                                                 | This study          |

**Table S1. Cont.**

| Strain or plasmid | Genotype/resistance                           | Source     |
|-------------------|-----------------------------------------------|------------|
| pclA              | VCA0526 of E7946 in pBR322, Ap <sup>R</sup>   | This study |
| pVCA0576          | VCA0576 of E7946 in pBR322, Ap <sup>R</sup>   | This study |
| pΔaphB            | ΔVC1049 of E7946 in pCVD442, Ap <sup>R</sup>  | This study |
| pΔclA             | ΔVCA0526 of E7946 in pCVD442, Ap <sup>R</sup> | This study |

**Table S2. List of oligonucleotides**

| Name of primer              | Sequence (5' to 3')*                                                                                |
|-----------------------------|-----------------------------------------------------------------------------------------------------|
| VC0072-5'-NheI              | AAAGCTAGCATAGCCGACATGAAATTAAGTGTGCTT                                                                |
| VC0072-3'-Sall              | AAAGTCGACCTACGCTTTCTCTTTGAGTTG                                                                      |
| VC0227-5'-BamHI             | AAAGGATCCAATAGATGTAATAATGCAGCAGCCAGAT                                                               |
| VC0227-3'-Sall              | AATGTCGACTCTTTTAATTAATATCACTCTCTAAC                                                                 |
| VC0704-5'-BamHI             | AAAGGATCCACTAGTTACGCTATTAGGTTATTTGTCGG                                                              |
| VC0702-3'-Sall              | AAAGTCGACGATGAGTTGAAGTGAATGAGAGC                                                                    |
| VC0784-5'-BamHI             | AATGGATCCAATAGTACCGAACACACAACAGACACAA                                                               |
| VC0784-3'-Sall              | AAAGTCGACGCGAATGCTAACCCTTTGACTTA                                                                    |
| VC0998-5'-EcoRV             | AATGATATCTAGTTTTGCCAGCCAGTCTATAGTTTTT                                                               |
| VC0998-3'-Sall              | AAAGTCGACGCGAGCTACACTCGCCCATTTCA                                                                    |
| VC1033-5'-BamHI             | AAAGGATCCAATAACTCCAAGGTGTAAGCTGATCAC                                                                |
| VC1033-3'-Sall              | AAAGTCGACCGAACCTCCTAGTTAAACGACC                                                                     |
| VC2137-5'-EcoRV             | AAAGATATCTAACAAACGGTGCAACCACAACCTTC                                                                 |
| VC2137-3'-Sall              | AAAGTCGACATTAATGCCAATATATTGACTATGGT                                                                 |
| clcA-5'-EcoRV               | AAAGATATCTAGATGCAGCGTATAATTCGGCAC                                                                   |
| clcA-3'-BamHI               | AAAGGATCCCTTATGAGTTGGGGCTCTGCGG                                                                     |
| VCA0576-5'-SphI             | AAAGCATGCATAGTACTCAACATGGAAATGCAGGTA                                                                |
| VCA0576-3'-Sall             | AAAGTCGACAAGCCCAGTGTAGACTATGTG                                                                      |
| tetR-5'-BamHI               | AATGGATCCCTAGAGTGTCAACAAAATTAGGAATTA                                                                |
| tetR-3'-KpnI                | TTAGGTACCATCACGGAAAAAGGTTATGCT                                                                      |
| phoA-5'-KpnI                | TTTGGTACCTTTTTAATGTATTTGTACATGGAGAA                                                                 |
| phoA-3'-XbaI                | AAATCTAGACATTAAGTCTGGTTGCTAACAGCA                                                                   |
| cat-5'-XbaI                 | AAATCTAGATAAGCTTGATGAAAAATTTGTTTGA                                                                  |
| cat-3'-BamHI                | TTTGGATCCCTTCTCAACTAACGGGGCA                                                                        |
| tetRphoAcat-5'-NotI         | TATGCGGGCCGCCCTAGGTAATTAGGATCCTAGAGT                                                                |
| tetRphoAcat-3'-NotI         | TTTTCGGGGCCGCCCTAGGTCCTATCCGCCAAAACAGCCAA                                                           |
| tetRphoAcat-5'-SacI         | ATAGAGCTCAGAGTGTCAACAAAATTAGGAATTA                                                                  |
| tetRphoAcat-3'-Sall         | TTTTCGACTTCTTCAACTAACGGGGCA                                                                         |
| tnpR-5'-BglII               | CGACCCGGGAGATCTCAATTGTTGAAATTTAGGATACATTTTTAT                                                       |
| tnpR-3'-XbaI                | TTTTCTAGATTAAGTTGGGTAACGCCAGGGT                                                                     |
| lacZ-5'-SacI                | TTTGAGCTCTGATTTACCGCCGCTGCCAA                                                                       |
| lacZ-3'-NheI                | TTTGCTAGCTTATTTGTTGGGTGATGACGCTTT                                                                   |
| irgA-SphI-1                 | AATGCATGCTCCGAGTAAACCGCAAACTT                                                                       |
| irgA-SacI-2                 | AATGAGCTCGTATCCCGCCGAGTGACCA                                                                        |
| irgA-Sall-3                 | AAAAGTCGACCGAACTATTCCATGTGT                                                                         |
| irgA-XbaI-4                 | AATTCCTAGAGTGGGTTTGGCGCTTA                                                                          |
| clcA-SphI-1 <sup>†</sup>    | ATAGCATGCAGAAATTAACGTGGCGACTAC                                                                      |
| clcA-SacI-2 <sup>†</sup>    | TAAGAGCTCACAATGACACCTATTGATGAAT                                                                     |
| clcA-SacI-1 <sup>†</sup>    | AATGAGCTCTAAGTCCACATAAGGCTGACT                                                                      |
| clcA-Sall-2 <sup>†</sup>    | TAAGTCGACACTAATGACACCTATTGATGAAT                                                                    |
| clcA-Sall-3 <sup>†,‡</sup>  | TAAGTCGACAAAGTCAATTTGCTTAAAGTAAAG                                                                   |
| clcA-XbaI-4 <sup>†,‡</sup>  | TATTCCTAGATGACCAGATAAGTGGCTAAG                                                                      |
| aphB-SacI-1                 | TATGAGCTCGAGCAATTTTGGCAGCAT                                                                         |
| aphB-Sall-2                 | TTTTCGACCGTTTCTGACACATTATGTTG                                                                       |
| aphB-Sall-3                 | AAAGTCGACAAAGCATTTCATAGAAAAAGGGC                                                                    |
| aphB-XbaI-4                 | TATTCCTAGAGACGGTTTGGTTGACGAGAGC                                                                     |
| P <sub>tetA</sub> -5'-3'    | CTAGCCAGAGAGCCTTAAGGCTCTCTTTTTTCTAATTTTTGTTGACACCC-<br>TATCAGTGATAGAGTTATTTTACCCTCCCTATCAGTGATAGA   |
| P <sub>tetA</sub> -3'-5'    | GATCTCTATCACTGATAGGGAGTGGTAAAATAACTCTATCACTGATAGGG-<br>TGTCACAAAATTAGAAAAAGAGAGCCTTAAGGCTCTCTGG     |
| P <sub>tet1</sub> -5'-3'    | CTAGCAGAGAGCCTTAAGGCTCTCTTTTTTCTAATTTTTGTTCCCTATCAGTGATAGAGATTGACATCCCTATCAGTGATAGAGATACTGAGCACATCA |
| P <sub>tet1</sub> -3'-5'    | GATCTGATGTGCTCAGTATCTCTATCACTGATAGGGATGTCAATCTCTATCACTGATAGGGACAAAATTAGAAAAAGAGAGCCTTAAGGCTCTCTG    |
| phoA-5'-probe               | TTTTTAATGTATTTGTACATGGAGAA                                                                          |
| phoA-3'-probe               | GTGATCTGCCATTAAGTCTGGTT                                                                             |
| seqPrimer-cat               | GAATTGTCAGATAGGCCTAATG                                                                              |
| qPCR-clcA-5'                | GAAGGTCCTACAGTACAA                                                                                  |
| qPCR-clcA-3'                | CAGGGTATAGCGAAATG                                                                                   |
| qPCR-irgA-5'                | ATACCGATAACCAAGTACC                                                                                 |
| qPCR-irgA-3'                | CTTTCGTGTTTACCTTCC                                                                                  |
| qPCR-VCr001-5' <sup>§</sup> | AGGGAGGAAGGTGGTTAAGT                                                                                |
| qPCR-VCr001-3' <sup>§</sup> | CGCTACACCTGAAATTTCTACCC                                                                             |

\*Restriction sites are underlined.

<sup>†</sup>Used for chromosomal *tpc*-cassette insertion.

<sup>‡</sup>Used for in-frame deletion mutagenesis.

<sup>§</sup>Oligonucleotides for 16S rRNA are according to ref. 61.

**Table S3. In vivo repressed genes of *V. cholerae***

| Operon*                                | Gene locus <sup>†</sup> | Annotation/gene symbol <sup>†</sup>                                |
|----------------------------------------|-------------------------|--------------------------------------------------------------------|
| <b>Cellular process and metabolism</b> |                         |                                                                    |
|                                        | VC0019                  | Valine-pyruvate transaminase ( <i>avtA</i> )                       |
|                                        | VC0072                  | Sensory box/GGDEF family protein                                   |
| VC0100-99                              | VC0100                  | Thiosulfate sulfurtransferase ( <i>glpE</i> )                      |
|                                        | VC0227                  | 3-Deoxy-D-manno-octulosonic-acid kinase                            |
| VC0418-22                              | VC0422                  | tldD protein                                                       |
|                                        | VC0516                  | Phage integrase                                                    |
|                                        | VC0537                  | Cysteine synthase B ( <i>cysM</i> )                                |
| VC0704-2                               | VC0703                  | c-di-GMP phosphodiesterase A-like protein                          |
|                                        | VC0711                  | clpB protein                                                       |
| VC0813-2                               | VC0812                  | Helicase-like protein                                              |
|                                        | VC0824                  | Thiol peroxidase ( <i>tpx</i> )                                    |
| VC1066-7                               | VC1067                  | Diguanylate cyclase                                                |
| VC1132-9                               | VC1136                  | Imidazole glycerol phosphate synthase subunit HisH ( <i>hisH</i> ) |
| VC1288-7                               | VC1287                  | Glucosyltransferase MdoH                                           |
| VC1449-51                              | VC1451                  | RTX toxin RtxA                                                     |
|                                        | VC1492                  | Glutamate dehydrogenase                                            |
|                                        | VC1554                  | Glycerophosphoryl diester phosphodiesterase                        |
|                                        | VC1758                  | Phage family integrase                                             |
|                                        | VC1765                  | Type I restriction enzyme HsdR                                     |
| VC1769-6                               | VC1768                  | Type I restriction enzyme, S subunit                               |
| VC2020-19                              | VC2019                  | 3-Oxoacyl-ACP synthase                                             |
|                                        | VC2033                  | Bifunctional acetaldehyde-CoA/alcohol dehydrogenase                |
|                                        | VC2110                  | 5-Methylaminomethyl-2-thiouridine methyltransferase                |
|                                        | VC2418                  | Thiol:disulfide interchange protein DsbC                           |
| VC2456-4                               | VC2454                  | GGDEF family protein                                               |
|                                        | VC2646                  | Phosphoenolpyruvate carboxylase                                    |
|                                        | VCA0316                 | Acetyltransferase                                                  |
|                                        | VCA0436                 | Acetyltransferase                                                  |
| VCA0445-4                              | VCA0445                 | Antitoxin StbD                                                     |
|                                        | VCA0490                 | GDXX family lipase                                                 |
|                                        | VCA0549                 | phnA protein                                                       |
|                                        | VCA0572                 | D-alanyl-alanine synthetase A ( <i>ddl</i> )                       |
|                                        | VCA0574                 | Acetyltransferase                                                  |
|                                        | VCA0657                 | Glycerol-3-phosphate dehydrogenase ( <i>glpD</i> )                 |
|                                        | VCA0700                 | Chitodextrinase                                                    |
|                                        | VCA0717                 | DNA helicase IV ( <i>held</i> )                                    |
| VCA0873-2                              | VCA0873                 | Cytochrome d ubiquinol oxidase subunit II                          |
|                                        | VCA0875                 | D-serine dehydratase                                               |
|                                        | VCr005                  | 23S ribosomal RNA ( <i>23Sb</i> )                                  |
|                                        | VCr014                  | 23S ribosomal RNA ( <i>23Se</i> )                                  |
| <b>Transporter Systems</b>             |                         |                                                                    |
|                                        | VC0784                  | Sodium/alanine symporter                                           |
|                                        | VC1033                  | Zinc/cadmium/mercury/lead-transporting ATPase ( <i>zntA</i> )      |
|                                        | VC1235                  | Sodium/dicarboxylate symporter                                     |
| VC1333-2                               | VC1332                  | Putative tricarboxylic transport membrane protein                  |
| VCA0107-20                             | VCA0114                 | Type VI secretion system protein ImpJ                              |
| VCA0122-4                              | VCA0123                 | VgrG protein                                                       |
|                                        | VCA0220                 | Hemolysin secretion protein HylB                                   |
|                                        | VCA0454                 | Sulfate-binding protein                                            |
|                                        | VCA0526                 | Chloride channel protein                                           |
|                                        | VCA0576                 | Heme transport protein HutA                                        |
|                                        | VCA0628                 | SecA-like protein                                                  |
| <b>Regulation</b>                      |                         |                                                                    |
| VC1653-1                               | VC1653                  | Sensory box sensor histidine kinase/response regulator VieS        |
|                                        | VC1831                  | Sensor histidine kinase                                            |
| VC2137-29                              | VC2137                  | Fis family transcriptional regulator                               |
|                                        | VCA0523                 | CAI-1 autoinducer synthase                                         |
|                                        | VCA1078                 | LuxR family transcriptional regulator                              |
| <b>Surface Structure</b>               |                         |                                                                    |
| VC0399-406                             | VC0403                  | MSHA biogenesis protein MshM                                       |
| VC0410-12                              | VC0411                  | MSHA pilin protein MshD                                            |
| VC0413-4                               | VC0414                  | MSHA biogenesis protein MshQ                                       |

**Table S3. Cont.**

| Operon*                 | Gene locus <sup>†</sup> | Annotation/gene symbol <sup>†</sup>                    |
|-------------------------|-------------------------|--------------------------------------------------------|
|                         | VC0845                  | Accessory colonization factor AcfD                     |
|                         | VC1329                  | Opacity protein-like protein                           |
| Motility and Chemotaxis |                         |                                                        |
|                         | VC0512                  | Methyl-accepting chemotaxis protein                    |
|                         | VC0998                  | Pilus assembly protein FimV                            |
| VC2137-29               | VC2134                  | Flagellar hook-basal body protein FliE ( <i>fliE</i> ) |
|                         | VCA0954                 | Chemotaxis protein CheV                                |
| Unknown                 |                         |                                                        |
|                         | VC0177                  | Hypothetical protein                                   |
| VC0178-81               | VC0180                  | Hypothetical protein                                   |
| VC0185-2                | VC0184                  | Hypothetical protein                                   |
| VCA0492-0               | VC0492                  | Hypothetical protein                                   |
|                         | VC0583                  | Pseudogene                                             |
|                         | VC0846                  | Pseudogene                                             |
| VC1183-4                | VC1183                  | Hypothetical protein                                   |
|                         | VC1224                  | Hypothetical protein                                   |
| VC1556-5                | VC1556                  | Hypothetical protein                                   |
| VC1764-1                | VC1764                  | Hypothetical protein                                   |
|                         | VC1794                  | Hypothetical protein                                   |
|                         | VC2338                  | Pseudogene                                             |
|                         | VC2600                  | Hypothetical protein                                   |
|                         | VC2739                  | Hypothetical protein                                   |
|                         | VCA0097                 | Hypothetical protein                                   |
| VCA0101-0               | VCA0101                 | Hypothetical protein                                   |
| VCA0105-6               | VCA0106                 | Hypothetical protein                                   |
|                         | VCA0163                 | Hypothetical protein                                   |
| VCA0176-7               | VCA0177                 | Hypothetical protein                                   |
|                         | VCA0186                 | Hypothetical protein                                   |
|                         | VCA0314                 | Hypothetical protein                                   |
|                         | VCA0325                 | Hypothetical protein                                   |
|                         | VCA0336                 | Hypothetical protein                                   |
|                         | VCA0361                 | Hypothetical protein                                   |
| VCA0369-70              | VCA0370                 | Hypothetical protein                                   |
|                         | VCA0374                 | Hypothetical protein                                   |
|                         | VCA0376                 | Hypothetical protein                                   |
|                         | VCA0395                 | Hypothetical protein                                   |
| VCA0396-7               | VCA0396                 | Hypothetical protein                                   |
|                         | VCA0453                 | Hypothetical protein                                   |
| VCA0497-8               | VCA0498                 | Hypothetical protein                                   |
| VCA0501-2               | VCA0501                 | Hypothetical protein                                   |
| VCA0580-78              | VCA0579                 | Hypothetical protein                                   |
|                         | VCA0731                 | Hypothetical protein                                   |
| VCA0776-8               | VCA0778                 | Hypothetical protein                                   |
|                         | VCA0874                 | Hypothetical protein                                   |

\*Operon prediction according to [www.microbesonline.org/](http://www.microbesonline.org/).

<sup>†</sup>Gene locus and annotation/gene symbol are according to the Kyoto Encyclopedia of Genes and Genomes ([www.genome.jp/kegg/](http://www.genome.jp/kegg/)).
